# Supplementary material for: Regulating the phase distribution of quasi-2D perovskites using a three-dimensional cyclic molecule toward improved light-emitting performance
Source: Royal Society of Chemistry journal article supplement (doi:10.1039/d2nr04735g), 2022-01-01
Supplement: d2nr04735g1.pdf [file d2nr04735g1.pdf]

## Supplementary Information

### **Regulating the Phase Distribution of Quasi-2D Perovskites using a Three-Dimensional Cyclic Molecule toward Improved Light-Emitting Performance**

*Chiung-Han Chen,<sup>a,b,+</sup> Chiao-Hsin Hsu,<sup>c,+</sup> I-Chih Ni,<sup>d</sup> Bi-Hsuan Lin,<sup>e</sup> Chih-I Wu,<sup>d</sup> Chi-Ching Kuo,<sup>c,\*</sup> and Chu-Chen Chueh<sup>a,b,\*</sup>*

<sup>a</sup> Department of Chemical Engineering, National Taiwan University, Taipei 10617, Taiwan

<sup>b</sup> Advanced Research Center for Green Materials Science and Technology, National Taiwan University, Taipei 10617, Taiwan

<sup>c</sup> Institute of Organic and Polymeric Material, National Taipei University of Technology, Taipei 10617, Taiwan

<sup>d</sup> Graduate Institute of Photonics and Optoelectronics, National Taiwan University, Taipei 10617, Taiwan

<sup>e</sup> National Synchrotron Radiation Research Center, Hsinchu 30076, Taiwan

<sup>+</sup> These authors contribute to this work equally.

<sup>\*</sup> Corresponding authors. E-mail: cchueh@ntu.edu.tw; kuocc@mail.ntut.edu.tw

**Keywords:** Quasi-2D perovskite; light-emitting diodes; cyclic molecules; phase regulation; additive engineering

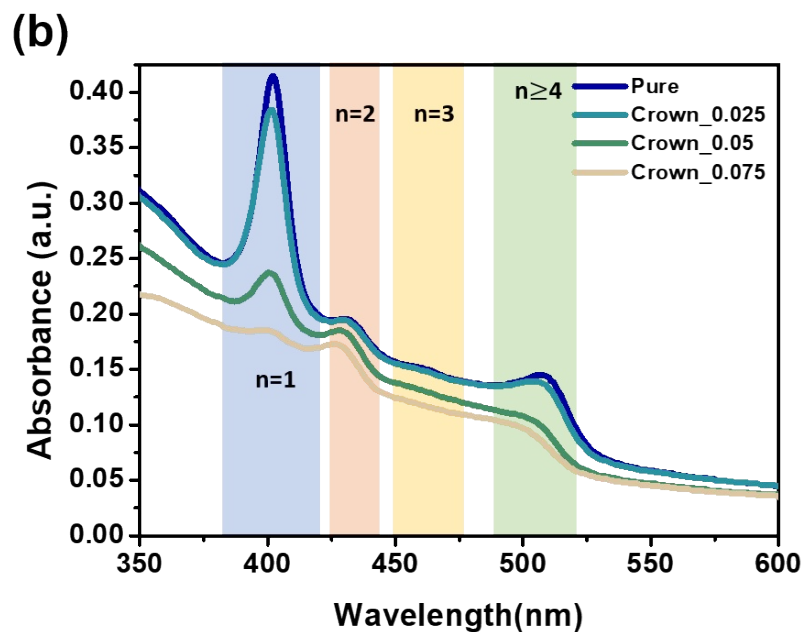

**Figure S1.** UV-vis absorption spectra of the quasi-2D perovskite films added with different doping ratios of Crown.

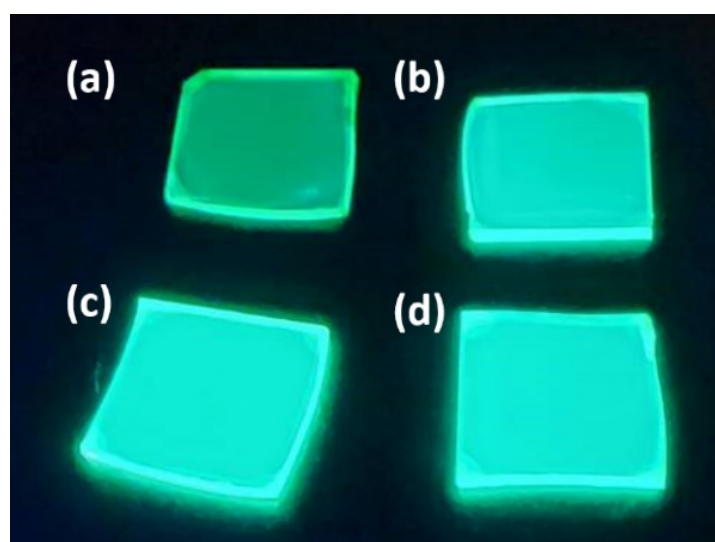

**Figure S2.** The films of (a) pristine quasi-2D perovskite and quasi-2D perovskite with (b) 0.025, (c) 0.05, and (d) 0.075 Cryptand (molar ratio relative to  $\text{PbBr}_2$ ) under the excitation of an UV lamp.

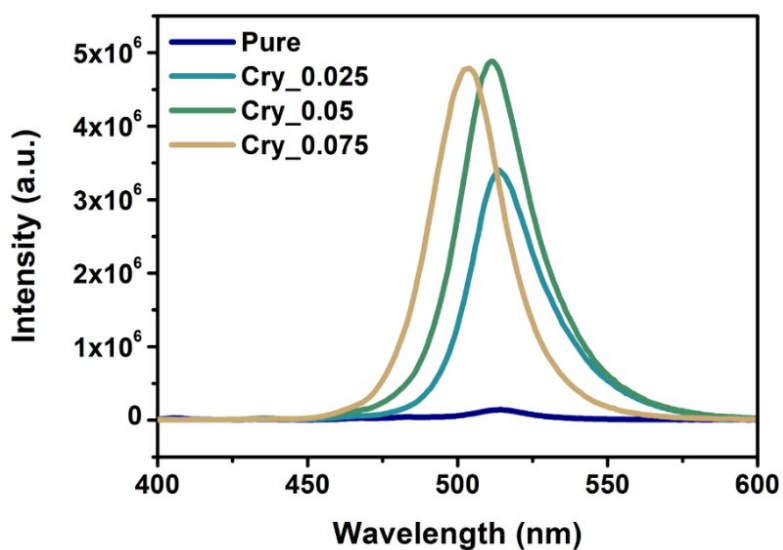

**Figure S3.** The originally unnormalized PL emission spectra of the quasi-2D perovskite films with different Cryptand doping ratios.

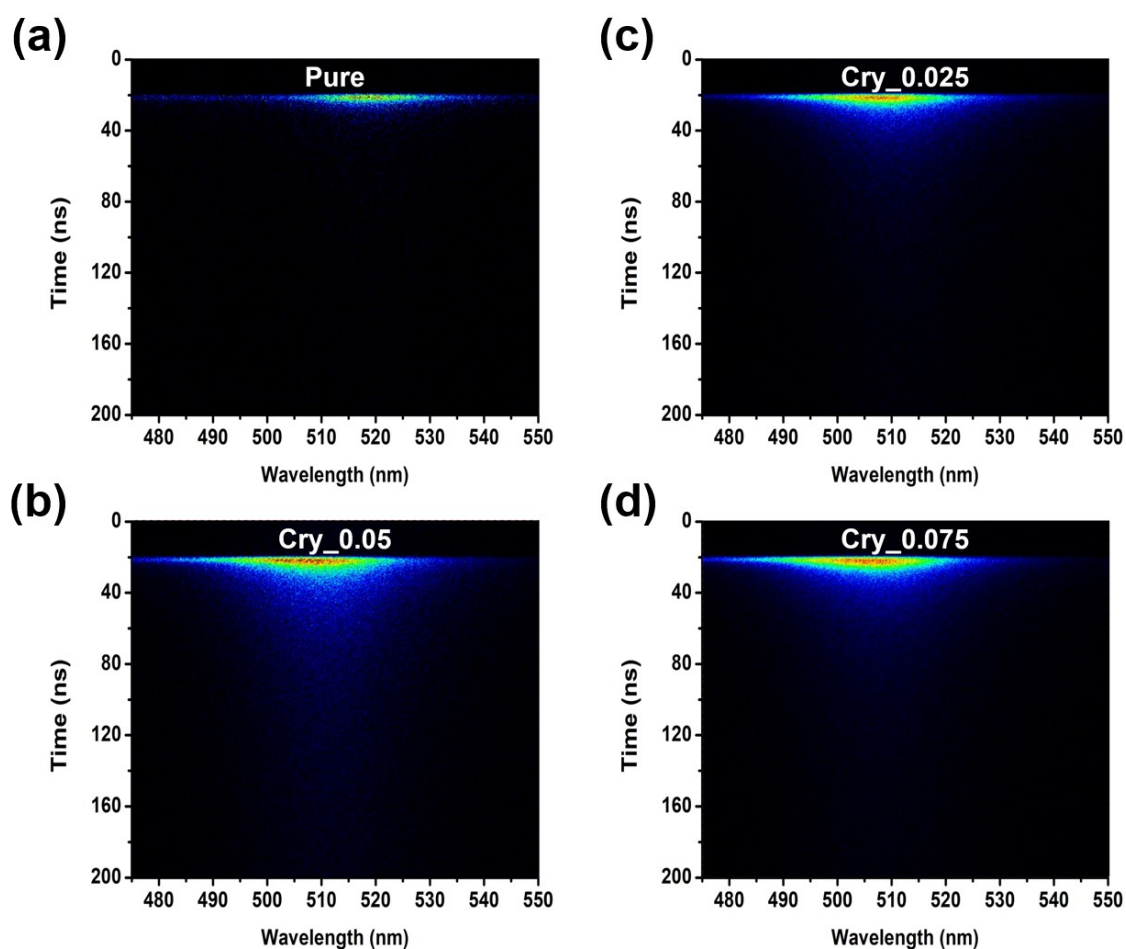

**Figure S4.** Time-resolved photoluminescence spectra (TRPL) for (a) the quasi-2D perovskite film and the films with (b) 0.025, (c) 0.05, and (d) 0.075 doping ratios of Cryptand.

**Table S1.** Fitting parameters of the TRPL results for the studied quasi-2D perovskite films.

| Material  | $\tau_1$<br>(ns) | $A_1$ | $\tau_2$<br>(ns) | $A_2$ | $\tau_{ave}$<br>(ns) |
|-----------|------------------|-------|------------------|-------|----------------------|
| Pure      | 2.25             | 0.89  | 9.92             | 0.12  | 5.2                  |
| Cry_0.025 | 3.39             | 0.82  | 21.20            | 0.2   | 14.3                 |
| Cry_0.05  | 3.57             | 0.75  | 25.77            | 0.26  | 19.5                 |
| Cry_0.075 | 3.93             | 0.87  | 25.77            | 0.18  | 16.8                 |

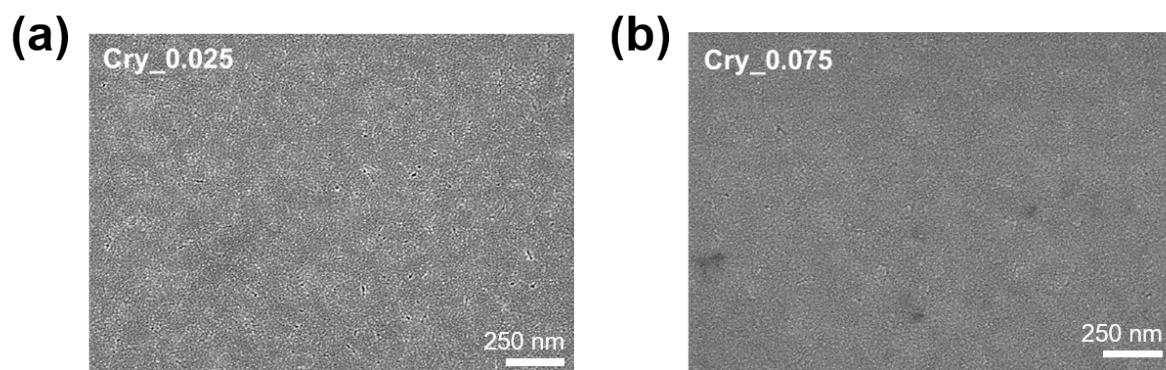

**Figure S5.** The SEM images of the quasi-2D perovskite films with (a) 0.025 and (b) 0.075 doping ratios of Cryptand.

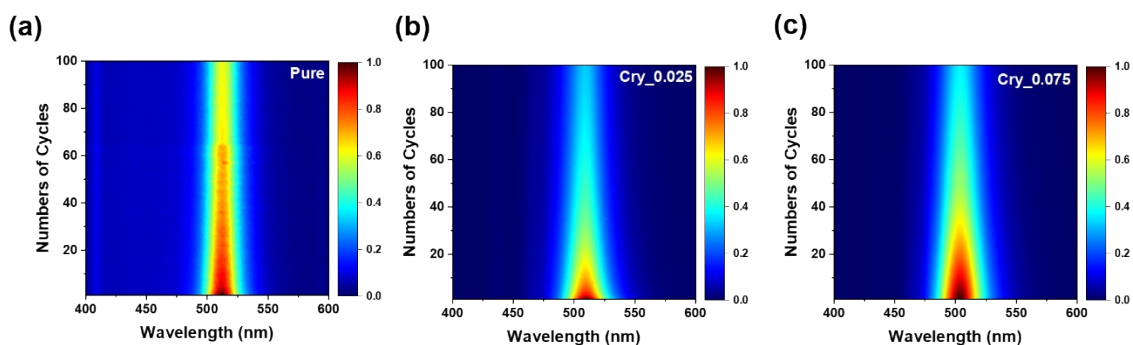

**Figure S6.** The contour plots of the PL stability test for (a) the quasi-2D perovskite film and the films with (b) 0.025 and (c) 0.075 doping ratios of Cryptand.

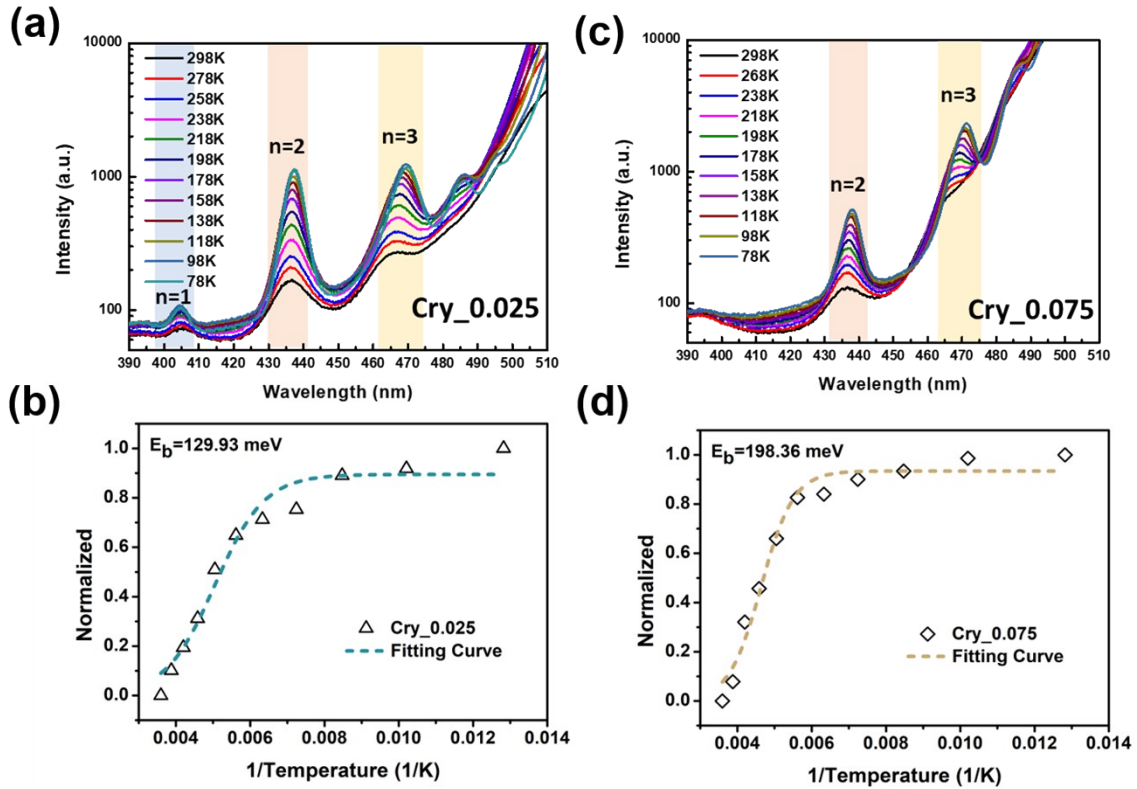

**Figure S7.** (a, c) Temperature-dependent PL spectra and (b, d) the calculated binding energy for the quasi-2D perovskite films with (a, b) 0.025 and (c, d) 0.075 doping ratios of Cryptand.

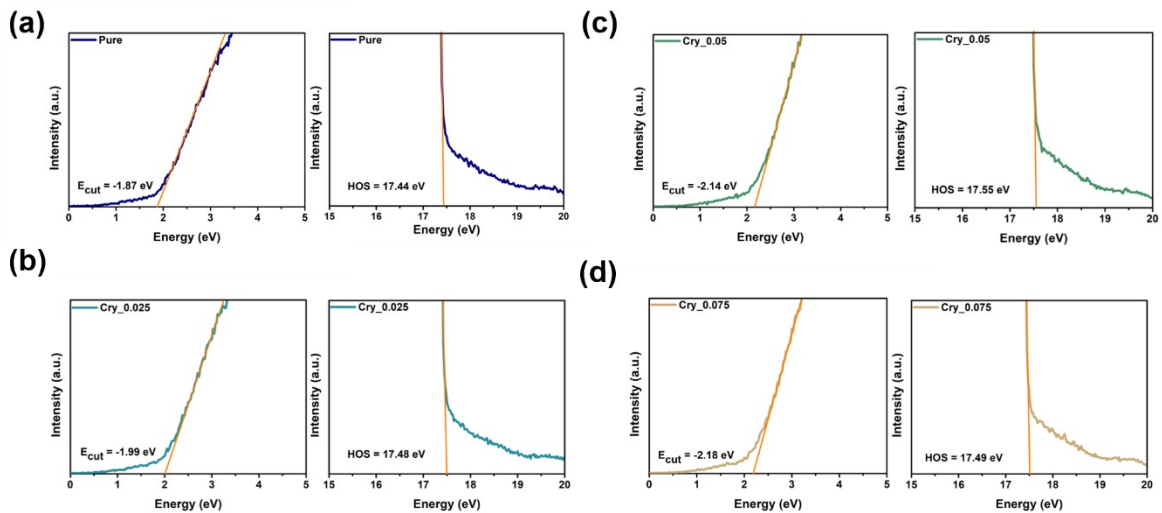

**Figure S8.** Ultraviolet photoelectron spectroscopy (UPS) spectra for (a) the quasi-2D perovskite film and the films with (b) 0.025, (c) 0.05, and (d) 0.075 doping ratios of Cryptand.

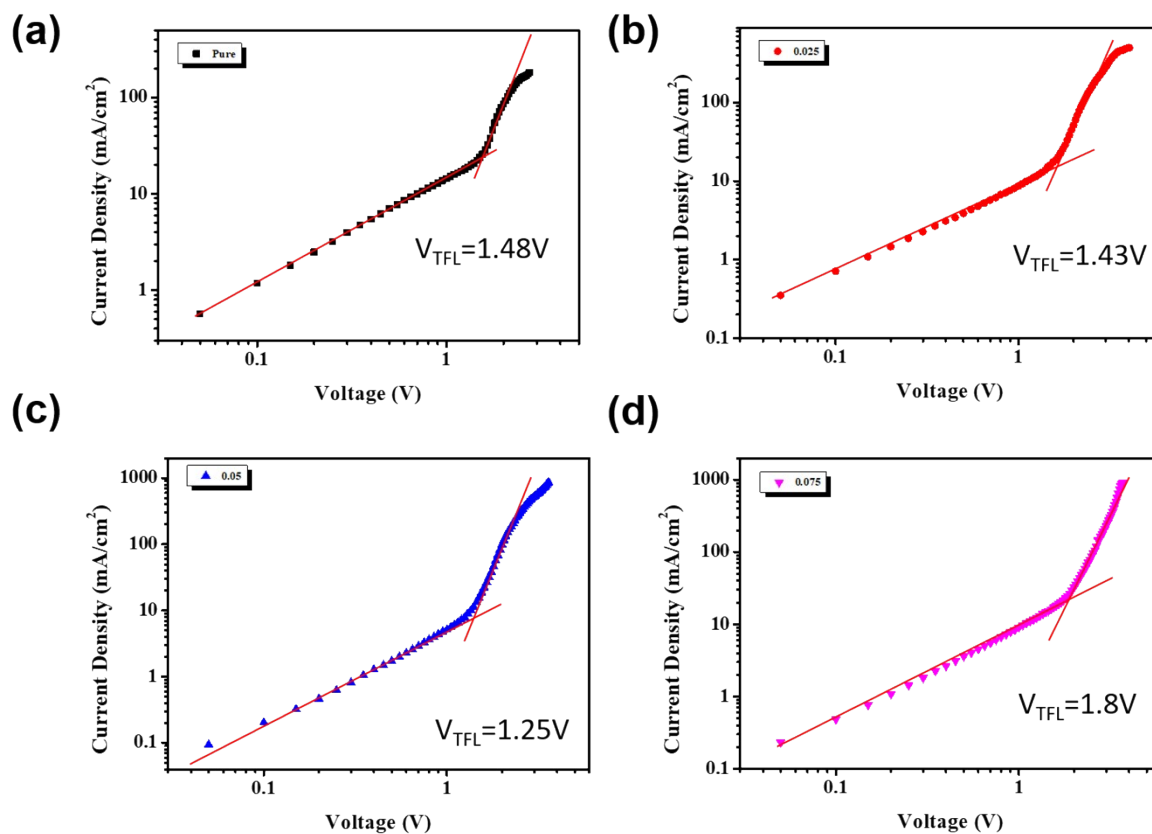

**Figure S9.** The calculated trap-filled limiting voltages ( $V_{TFL}$ ) from the space charged limited current (SCLC) measurement of the hole-only devices based on (a) the pristine quasi-2D perovskite film and the films with (b) 0.025, (c) 0.05 and (d) 0.075 doping ratios of Cryptand.

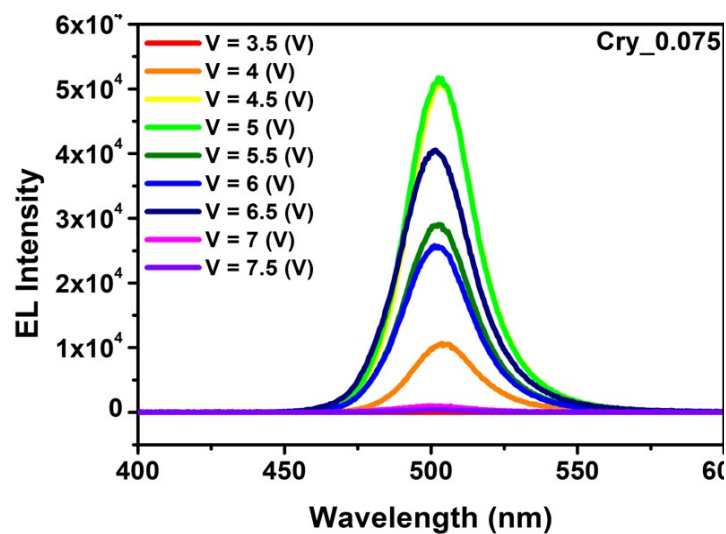

**Figure S10.** The EL curves of the device recorded under different biases based on the film with

0.075 doping ratio of Cryptand.

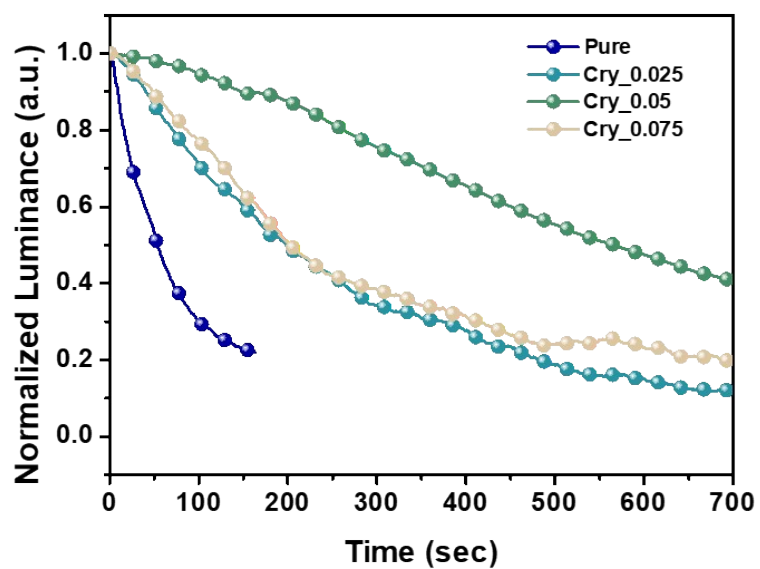

**Figure S11.** Operational stability of the fabricated PeLEDs based on the pristine quasi-2D perovskite film and the films with 0.025, 0.05 and 0.075 doping ratios of Cryptand.
